# Supplementary material
Source: publisher figshare collection journal article supplement (https://gsajournals.figshare.com/articles/dataset/_/14417696)
Supplement: Supplementary file 3 [file 1]

# Supplemental Figure 1

## A

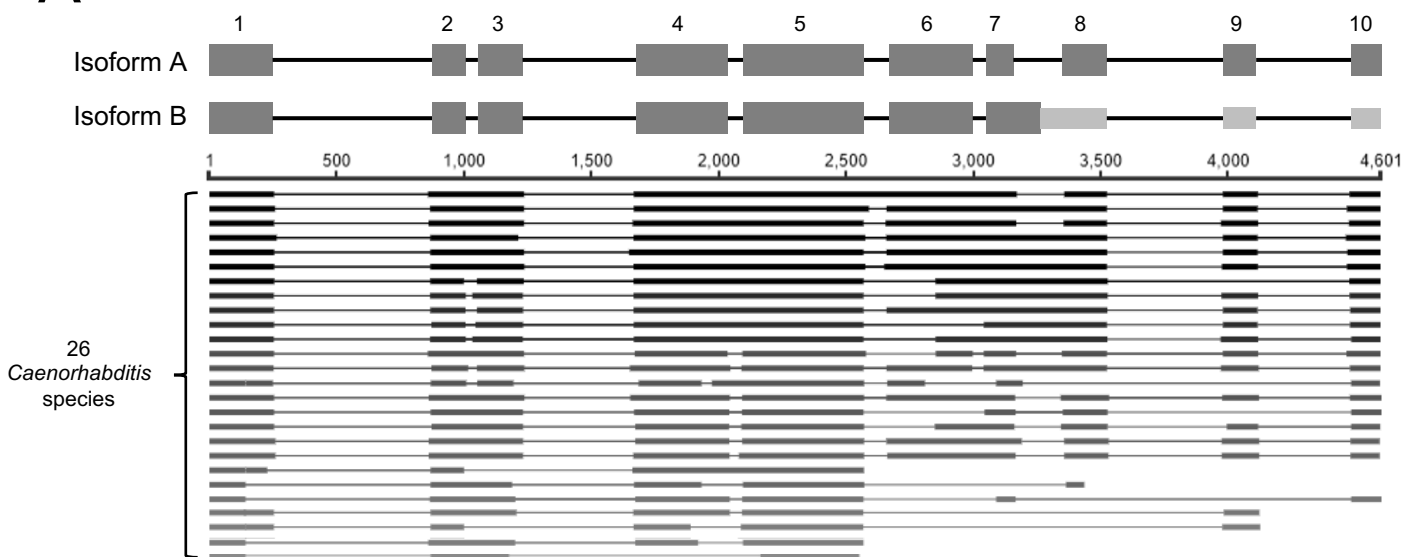

## B

|                                        | 10    | 20    | 30       | 40     | 50     | 60      | 70      |                                       |
|----------------------------------------|-------|-------|----------|--------|--------|---------|---------|---------------------------------------|
| <i>C.elegans</i> /1-35                 | VRF   | VF    | IEKEEDMN | TLLFF  | FRYF   | ASSFRVY | PVHTLTY |                                       |
| <i>C.dougherty</i> /1-16               | VSFFF | SLHLK | RGFETK   |        |        |         |         |                                       |
| <i>C.sinica</i> /1-14                  | VRF   | ESLK  | IEKKKK   |        |        |         |         |                                       |
| <i>C.sp</i> 40/1-7                     | VRF   | EALN  |          |        |        |         |         |                                       |
| <i>C.sp</i> 26/1-18                    | VRF   | REFEL | SKRRR    | RFETK  |        |         |         |                                       |
| <i>C.sp</i> 39/1-46                    | VRF   | IETSR | KEKKEKSV | LLLLL  | SPLLP  | RRRIR   | PFPPSH  | LVVVKW                                |
| <i>C.nouraguensis</i> /1-33            | VRF   | TETSS | RRR      | VFFFF  | SRSTAR | HRIR    | FLPHTY  |                                       |
| <i>C.sp</i> 32/1-61                    | VRF   | GNERG | RKRR     | TLFFF  | CLFAS  | SDPSL   | THTNVV  | VVKWGRERKEARRRRERAQIDFQAGGGGG         |
| <i>C.afra</i> /1-67                    | VRF   | GERRR | GRRRR    | TLLFFF | SLLAS  | FAPSL   | THTSVV  | VVKWRRERKTARRRRERAQIDFQAGGGGGAGAG     |
| <i>C.sp</i> 29/1-9                     | VRF   | TETSS |          |        |        |         |         |                                       |
| <i>C.sp</i> 34( <i>nopinata</i> )/1-67 | VSG   | EGKRV | DHNNT    | FRF    | SLFS   | ISSSHS  | FSHSG   | TPSHIGRCKVEMEKSGGGGEEGIFFFSHSSTPQDKLN |
