# Supplementary material
Source: publisher figshare collection journal article supplement (https://gsajournals.figshare.com/articles/dataset/_/14417696)
Supplement: Supplementary file 5 [file 1]

**Table S1. Strains used in this manuscript:**

| Strain  | Genotype                                                                                   |
|---------|--------------------------------------------------------------------------------------------|
| N2      | wild type                                                                                  |
| CZ27358 | <i>jph-1(ju1683) I</i>                                                                     |
| CZ27360 | <i>jph-1(ju1684) I</i>                                                                     |
| CZ28073 | <i>jph-1(ju1683) I; juEx3390[jph-1 fosmid WRM0622aB02]</i>                                 |
| CZ28260 | <i>jph-1(ju1683) I; juEx3392[jph-1 fosmid WRM0623aF07]</i>                                 |
| CZ27162 | <i>juEx8014[Pjph-1-GFP]</i>                                                                |
| CZ27161 | <i>juEx8013[Pjph-1-GFP]</i>                                                                |
| CZ28024 | <i>jph-1(ju1683) I; juEx7999[Pjph-1-GFP::JPH-1A]</i>                                       |
| CZ27777 | <i>jph-1(ju1683) I; juSi387[Pjph-1-GFP::JPH-1A] IV</i>                                     |
| CZ27603 | <i>jph-1(ju1683) I; juEx8037[Pjph-1-GFP::JPH-1B]</i>                                       |
| CZ27606 | <i>jph-1(ju1683) I; juEx8038[Pjph-1-GFP::JPH-1B]</i>                                       |
| CZ27364 | <i>juSi387[Pjph-1-GFP::JPH-1A] IV</i>                                                      |
| CZ28264 | <i>nuTi144 [Pmyo-3 GFP 1-10 G418] I; unc-68(nu664) V; juEx8103[Pjph-1-mKate2::JPH-1A]</i>  |
| CZ28263 | <i>nuTi144 [Pmyo-3 GFP 1-10 G418] I; egl-19(nu674) IV; juEx8103[Pjph-1-mKate2::JPH-1A]</i> |
| CZ27404 | <i>juSi387[Pjph-1-GFP::JPH-1A] IV; juls540[Pmec-4-mKate2::ESYT-2] X</i>                    |
| CZ27569 | <i>juEx8038[Pjph-1-GFP::JPH-1B]</i>                                                        |
| CZ24806 | <i>eat-4(ky5)</i>                                                                          |
| CZ27782 | <i>jph-1(ju1683) I; juEx8041[Pmyo-2-GFP::JPH-1A]</i>                                       |
| CZ28120 | <i>jph-1(ju1683) I; juEx8022[Pmyo-3-GFP::JPH-1A]</i>                                       |
| CZ28121 | <i>jph-1(ju1683) I; juEx8023[Pmyo-3-GFP::JPH-1A]</i>                                       |
| CZ28051 | <i>jph-1(ju1683) I; juSi389(Prab-3-GFP::JPH-1A) IV</i>                                     |
| CZ13170 | <i>jph-1(ok2823) I</i>                                                                     |
| CZ13990 | <i>jph-1(ok2823) I; juEx3390[jph-1 fosmid WRM0622aB02]</i>                                 |

|         |                                                                                                                                |
|---------|--------------------------------------------------------------------------------------------------------------------------------|
| CZ27483 | <i>jph-1(ok2823) I; juEx3392[jph-1 fosmid WRM0623aF07]</i>                                                                     |
| CZ10969 | <i>muls32(Pmec-7-GFP) II</i>                                                                                                   |
| CZ26391 | <i>jph-1(ok2823) I; muls32[Pmec-7-GFP] II</i>                                                                                  |
| CZ27359 | <i>jph-1(ju1683) I; muls32[Pmec-7-GFP] II</i>                                                                                  |
| CZ27778 | <i>jph-1(ju1683) I; muls32[Pmec-7-GFP] II; juSi387[Pjph-1-GFP::JPH-1A]IV</i>                                                   |
| CZ27783 | <i>jph-1(ju1683) I; muls32[Pmec-7-GFP] II; juEx8041[Pmyo-2-GFP::JPH-1A]</i>                                                    |
| CZ27910 | <i>jph-1(ju1683) I; muls32[Pmec-7-GFP] II; juSi388[Pmec-4-GFP::JPH-1A]IV</i>                                                   |
| OD2984  | <i>ltSi953[Pmec-18-Degron-SL2-mKate2; cb-unc-119(+)]II; unc-119(ed3)III</i>                                                    |
| CZ27842 | <i>jph-1(ju1683) I; ltSi953[Pmec-18-Degron-SL2-mKate2; cb-unc-119(+)] II; juSi387[Pjph-1-GFP::JPH-1A] IV; unc-119(ed3)?III</i> |
| CZ27361 | <i>jph-1(ju1684) I; muls32[Pmec-7-GFP] II</i>                                                                                  |
| CZ27536 | <i>juEx8035[Pjph-1-GFP::JPH-1(ok2823)]</i>                                                                                     |
| CZ28262 | <i>nuls321[Punc-17-mCherry]; juEx7999[Pjph-1-GFP::JPH-1A]</i>                                                                  |
| CZ27875 | <i>juSi388[Pmec-4-GFP::JPH-1A] IV</i>                                                                                          |
| CZ28377 | <i>unc-17(ot907) IV; juEx8026[Prab-3-GFP::JPH-1A]</i>                                                                          |
| CZ28392 | <i>unc-17(ot907) IV; juEx8113[Prgef-1-GFP::ESYT-2]</i>                                                                         |
| CZ26322 | <i>esyt-2(ju1409) III</i>                                                                                                      |
| CZ28238 | <i>esyt-2(ju1409) III; juEx7581 [esyt-2 gDNA]</i>                                                                              |
| CZ28390 | <i>juEx8112[Prgef-1-GFP::ESYT-2]</i>                                                                                           |
| CZ28391 | <i>esyt-2(ju1409) III; juEx8112[Prgef-1-GFP::ESYT-2]</i>                                                                       |
| CZ28070 | <i>jph-1(ju1683) I; esyt-2(ju1409) III</i>                                                                                     |
| CZ26389 | <i>esyt-2(ju1408) III</i>                                                                                                      |
| CZ28241 | <i>jph-1(ju1684) I; esyt-2(ju1408) III</i>                                                                                     |
| CZ28282 | <i>jph-1(ju1683) I; esyt-2(ju1409) III; juEx7581 [esyt-2 gDNA]</i>                                                             |
| CB540   | <i>unc-68(e540) V</i>                                                                                                          |
| CZ28026 | <i>jph-1(ju1683) I; unc-68(e540)V; juEx7999[Pjph-1-GFP::JPH-1A]</i>                                                            |

|         |                                                                                                                                       |
|---------|---------------------------------------------------------------------------------------------------------------------------------------|
| CZ26691 | <i>egl-19(ad1006lf) IV</i>                                                                                                            |
| DA695   | <i>egl-19(ad695gf) IV</i>                                                                                                             |
| CZ27905 | <i>jph-1(ju1683) I; egl-19(ad695gf) IV</i>                                                                                            |
| CB55    | <i>unc-2(e55) X</i>                                                                                                                   |
| CZ28054 | <i>jph-1(ju1683) I; unc-2(e55) X; juEx7999[Pjph-1-GFP::JPH-1A]</i>                                                                    |
| QW47    | <i>unc-2(zf35gf) X</i>                                                                                                                |
| CZ27903 | <i>jph-1(ju1683) I; unc-2(zf35gf) X</i>                                                                                               |
| CZ28025 | <i>unc-68(e540) V; juEx7999[Pjph-1-GFP::JPH-1A]</i>                                                                                   |
| CZ28053 | <i>unc-2(e55) X; juEx7999[Pjph-1-GFP::JPH-1A]</i>                                                                                     |
| CZ28055 | <i>esy-2(ju1409) III; juSi387[Pjph-1-GFP::JPH-1A] IV</i>                                                                              |
| KP10704 | <i>egl-19(nu674) IV; unc-68(nu628) V; nuTi456[Ppat-10-mCherry1-10::SL2::GFP1-10] III</i>                                              |
| KP10705 | <i>egl-19(nu674) IV; unc-68(nu628) V; nuTi456[Ppat-10-mCherry1-10::SL2::GFP1-10] III; jph-1(ju1683); juEx8041[Pmyo-2-GFP::JPH-1A]</i> |

**Table S2. Plasmid used in this manuscript:**

| <b>Plasmid name</b> | <b>Description</b>                                                                             |
|---------------------|------------------------------------------------------------------------------------------------|
| pCZGY3516           | <i>Pjph-1</i> -GFP:: <i>JPH-1A</i>                                                             |
| pCZGY3519           | <i>Pjph-1</i> -GFP:: <i>JPH-1A</i> with homology arms for CRISPR/Cas9 knock-in                 |
| pCZGY3525           | <i>Pjph-1</i> -GFP:: <i>JPH-1B</i>                                                             |
| pCZGY3344           | <i>Pmec-4</i> -mKate2:: <i>ESYT-2</i>                                                          |
| pCZGY3518           | <i>Pjph-1</i> -GFP                                                                             |
| pCZGY3523           | <i>Pmyo-2</i> -GFP:: <i>JPH-1A</i>                                                             |
| pCZGY3522           | <i>Prab-3</i> -GFP:: <i>JPH-1A</i> with homology arms for CRISPR/Cas9 knock-in                 |
| pCZGY3535           | <i>Pmyo-3</i> -GFP:: <i>JPH-1A</i>                                                             |
| pCZGY3520           | <i>Pmec-4</i> -GFP:: <i>JPH-1A</i> with homology arms for CRISPR/Cas9 knock-in                 |
| pCZGY2750           | <i>Peft-3</i> :Cas9 + cxTi10882 sgRNA                                                          |
| pCFJ90              | <i>Pmyo-2</i> -mCherry (Frøkjær-Jensen et al. 2008)                                            |
| pCFJ104             | <i>Pmyo-3</i> -mCherry (Frøkjær-Jensen et al. 2008)                                            |
| pCZGY3529           | <i>Pjph-1</i> -GFP:: <i>JPH-1(ok2823)</i>                                                      |
| WRM0622aB02         | Fosmid containing entire genomic DNA of <i>jph-1</i>                                           |
| WRM0623aF07         | Fosmid containing entire genomic DNA of <i>jph-1</i>                                           |
| pKP3315             | <i>Pmyo-3</i> split-GFP(1-10) miniMOS G418                                                     |
| pKP4522             | <i>Ppat-10</i> split-mCherry(1-10)::SL2::split-GFP(1-10) miniMOS G418                          |
| pKP3318             | <i>egl-19</i> exon 1, gRNA 5'-TTACCTGACATGATGGACAC-3'                                          |
| pKP3319             | <i>egl-19</i> exon 1, 7x split-GFP(FP11) with homology arms for CRISPR/Cas9 knock-in           |
| pKP3320             | <i>unc-68A</i> exon 31 gRNA 5'-GATGCTGCAGCCACGGGCGG-3'                                         |
| pKP3321             | <i>unc-68A</i> exon 31, 7x split-GFP(FP11) with 1kb homology arms for CRISPR/Cas9 knock-in     |
| pKP4523             | <i>unc-68a</i> exon 31, 4x split-mCherry(FP11) with 1kb homology arms for CRISPR/Cas9 knock-in |

|        |                                                                                |
|--------|--------------------------------------------------------------------------------|
| pGW28  | <i>unc-58</i> gRNA co-CRISPR 5'-ATCCACGCACATGGTCACTA-3' (Arribere et al. 2014) |
| pDD162 | <i>Peft-3</i> -CAS9 (Dickinson et al. 2013)                                    |

**Table S3. Transgenes used in this manuscript:**

| Transgene name and brief description       | Injected DNA       | Injected conc. (ng/ $\mu$ l) | Co-injection marker and conc.         | Source                    |
|--------------------------------------------|--------------------|------------------------------|---------------------------------------|---------------------------|
| <i>juEx3390[jph-1 fosmid WRM0622aB02]</i>  | fosmid WRM0622aB02 | 10                           | <i>Pttx-3</i> -RFP (30 ng/ $\mu$ l)   | This manuscript           |
| <i>juEx3392[jph-1 fosmid WRM0623aF07]</i>  | fosmid WRM0623aF07 | 10                           | <i>Pttx-3</i> -RFP (30 ng/ $\mu$ l)   | This manuscript           |
| <i>juEx8014[Pjph-1-GFP]</i>                | pCZGY3518          | 2.5                          | <i>Punc-122</i> -RFP (50 ng/ $\mu$ l) | This manuscript           |
| <i>juEx8013[Pjph-1-GFP]</i>                | pCZGY3518          | 2.5                          | <i>Punc-122</i> -RFP (50 ng/ $\mu$ l) | This manuscript           |
| <i>juEx7999[Pjph-1-GFP::JPH-1A]</i>        | pCZGY3516          | 2.5                          | <i>Punc-122</i> -RFP (50 ng/ $\mu$ l) | This manuscript           |
| <i>juSi387[Pjph-1-GFP::JPH-1A]</i>         | pCZGY3519          | 2.5                          |                                       | This manuscript           |
| <i>juEx8037[Pjph-1-GFP::JPH-1B]</i>        | pCZGY3525          | 2.5                          | <i>Punc-122</i> -RFP (50 ng/ $\mu$ l) | This manuscript           |
| <i>juEx8038[Pjph-1-GFP::JPH-1B]</i>        | pCZGY3525          | 2.5                          | <i>Punc-122</i> -RFP (50 ng/ $\mu$ l) | This manuscript           |
| <i>juls540[Pmec-4-mKate2::ESYT-2]</i>      |                    |                              |                                       | Kim <i>et al.</i> , 2018  |
| <i>juEx8041[Pmyo-2-GFP::JPH-1A]</i>        | pCZGY3523          | 0.125                        | <i>Punc-122</i> -RFP (50 ng/ $\mu$ l) | This manuscript           |
| <i>juEx8022[Pmyo-3-GFP::JPH-1A]</i>        | pCZGY3535          | 2.5                          | <i>Punc-122</i> -RFP (50 ng/ $\mu$ l) | This manuscript           |
| <i>juEx8023[Pmyo-3-GFP::JPH-1A]</i>        | pCZGY3535          | 2.5                          | <i>Punc-122</i> -RFP (50 ng/ $\mu$ l) | This manuscript           |
| <i>juSi389[Prab-3-GFP::JPH-1A]</i>         | pCZGY3522          | 10                           |                                       | This manuscript           |
| <i>juSi388[Pmec-4-GFP::JPH-1A]</i>         | pCZGY3520          | 2.5                          |                                       | This manuscript           |
| <i>ItSi953[pOD2087/pSW408]</i>             |                    |                              |                                       | Wang <i>et al.</i> , 2017 |
| <i>juEx8035[Pjph-1-GFP::JPH-1(ok2823)]</i> | pCZGY3529          | 2.5                          | <i>Punc-122</i> -RFP (50 ng/ $\mu$ l) | This manuscript           |

|                                                   |         |    |  |                 |
|---------------------------------------------------|---------|----|--|-----------------|
| <i>nuTi144[Pmyo-3-GFP1-10]</i>                    | pKP3315 | 10 |  | This manuscript |
| <i>nuTi456[Ppat-10-mCherry1-10::SL2::GFP1-10]</i> | pKP4522 | 10 |  | This manuscript |

**Table S4. Primers used in this manuscript:**

| <b>a. Primers for cloning</b> |                                                                                                                 |                                                                 |
|-------------------------------|-----------------------------------------------------------------------------------------------------------------|-----------------------------------------------------------------|
| <b>Name</b>                   | <b>Sequence (5' to 3')</b>                                                                                      | <b>Purpose</b>                                                  |
| YJ12558                       | gacgtaggtgtgtcagcag                                                                                             | 5' flanking primer to amplify <i>jph-1</i> cDNA                 |
| YJ12559                       | cctgaggagaagtgtgtctg                                                                                            | 3' flanking primer to amplify <i>jph-1</i> cDNA                 |
| YJ12560                       | atgaatggaggcagatttgac                                                                                           | Forward primer to amplify <i>jph-1</i> from start codon         |
| YJ12561                       | ctacgaagaagacttcttcttcttc                                                                                       | Reverse primer to amplify <i>jph-1</i> isoform A to stop codon  |
| YJ12562                       | ctaatatgtgagggtgtgtaccg                                                                                         | Reverse primer to amplify <i>jph-1</i> isoform B to stop codon  |
| YJ12563                       | tgttctgccattaccagcccg                                                                                           | Forward primer to amplify 4.5 kb <i>jph-1</i> promoter          |
| YJ12564                       | ttccatttgccgtactgctg                                                                                            | Reverse primer to amplify 4.5 kb <i>jph-1</i> promoter          |
| AF-JA-76                      | atTTTgtgtataaaatagccgagttaggaacaaa<br>TTTTctttcaggtttctcagtagtgaccatgtgcgtg<br>gatcttgcgtccacacatctcaaggcgtactt | <i>unc-58(gf)</i> co-CRISPR repair oligo (Arribere et al. 2014) |

| <b>b. Genotyping primer sets</b> |                              |                                                                   |                                                                                 |
|----------------------------------|------------------------------|-------------------------------------------------------------------|---------------------------------------------------------------------------------|
| <b>Name</b>                      | <b>Sequence</b>              | <b>Purpose</b>                                                    | <b>Product size</b>                                                             |
| YJ12565                          | gacgacggcggaacctatg          | Genotyping <i>jph-1(ju1683)</i> and <i>jph-1(ju1684)</i>          | WT 154 bp,<br><i>ju1683</i> 250 bp,<br><i>ju1683</i> 294 bp,<br>cDNA no product |
| YJ12566                          | tcaggtacgttctagtcggt         |                                                                   |                                                                                 |
| YJ12567                          | gtcttgctggtaacgtcgt          |                                                                   |                                                                                 |
| YJ10503                          | ggaacaaaggagttcagatcctgtg    | Genotyping single copy insertion ( <i>juSi</i> ) on Chromosome IV | WT 562 bp,<br><i>juSi</i> 744 bp                                                |
| YJ10504                          | ggaagacccttagttcacaacaagtg   |                                                                   |                                                                                 |
| YJ10686                          | TTTTcagaaatatatgccgaggatgttc |                                                                   |                                                                                 |



|         |                                      |                                                                           |                                                             |
|---------|--------------------------------------|---------------------------------------------------------------------------|-------------------------------------------------------------|
| YJ12568 | gtctacgatcaagtggttca                 | Genotyping <i>jph-1(ok2823)</i>                                           | WT 273 bp,<br><i>ok2823</i> 390 bp, cDNA 870 bp             |
| YJ12569 | gaacaatagacaccgatgga                 |                                                                           |                                                             |
| YJ12570 | atcaacctggcacgataatt                 |                                                                           |                                                             |
| YJ12571 | ggattccacgaactggtgatg                | PCR amplification to genotype <i>unc-68(e540)</i> by Sanger sequencing    | 453 bp                                                      |
| YJ12572 | cttttcagcagcattcacc                  |                                                                           |                                                             |
| YJ12573 | gtacttcgaactgatgcaatgtc              | PCR amplification to genotype <i>egl-19(ad695gf)</i> by Sanger sequencing | 370 bp                                                      |
| YJ12574 | gtgaaatcatcgcacatctccg               |                                                                           |                                                             |
| YJ12575 | gaatgatccaccacgggttg                 | PCR amplification to genotype <i>unc-2(zf35gf)</i> by Sanger sequencing   | 478 bp                                                      |
| YJ12576 | catcagaatgagcgtggtgagc               |                                                                           |                                                             |
| YJ12052 | taaagtaacagccgcgcca                  | Genotyping <i>esyt-2(ju1408)</i> and <i>esyt-2(ju1409)</i>                | WT 324 bp,<br><i>ju1408</i> 733 bp,<br><i>ju1409</i> 733 bp |
| YJ12577 | aatatgtgctagcaagtatttga              |                                                                           |                                                             |
| YJ12578 | ctttgccactgtgtccattg                 |                                                                           |                                                             |
| YJ12582 | cgcgccccagtcgccacatggtgtgacg         | Genotyping <i>nuTi144</i>                                                 | WT 612 bp,<br><i>nuTi144</i> no product                     |
| YJ12583 | gggtacggtattgcaagctggc               |                                                                           |                                                             |
| YJ12582 | cgcgccccagtcgccacatggtgtgacg         | Genotyping <i>nuTi144</i>                                                 | WT no product,<br><i>nuTi144</i> 500bp                      |
| YJ12584 | agctagcgacggcaaatact                 |                                                                           |                                                             |
| nuz2308 | gttcggtcggacatgggtcagacttgggagcaaccg | Genotyping <i>nuTi456</i>                                                 | WT 1004 bp,<br><i>nuTi456</i> no product                    |
| nuz2309 | gcacatgtatcatatcacatggtgtagtatcagg   |                                                                           |                                                             |
| nuz2308 | gttcggtcggacatgggtcagacttgggagcaaccg | Genotyping <i>nuTi456</i>                                                 | WT no product,<br><i>nuTi456</i> 500bp                      |
| YJ12584 | agctagcgacggcaaatact                 |                                                                           |                                                             |
| YJ12585 | gatctactgtctttgtgctaaagctgtctgg      | Genotyping <i>egl-19(nu674)</i>                                           | WT 2297 bp,<br><i>nu674</i> 2723 bp                         |
| YJ12586 | ccaaagtaaaggacctaaccgtcaaaatatcc     |                                                                           |                                                             |

|         |                                |                                                          |                                                           |
|---------|--------------------------------|----------------------------------------------------------|-----------------------------------------------------------|
| YJ12585 | gatctactgtcttttgctaaagctgtctgg | Genotyping <i>egl-19(nu674)</i>                          | WT no product,<br><i>nu674</i> 1185 bp                    |
| YJ12587 | cgtactcgtgaagaaccatgtgatcacg   |                                                          |                                                           |
| YJ12588 | cgtgaagagctgaactatgtg          | Genotyping <i>unc-68(nu664)</i> and <i>unc-68(nu628)</i> | WT 549 bp,<br><i>nu664</i> 975 bp,<br><i>nu628</i> 825 bp |
| YJ12589 | cccaactggtagtaatctcttc         |                                                          |                                                           |

| c. crRNAs |                                                |                            |
|-----------|------------------------------------------------|----------------------------|
| Name      | Sequence                                       | Purpose                    |
| YJ12590   | 5'-rCrCrGrUrCrCrGrGrUrArArCrArCrCrUrArUrCrA-3' | Target <i>jph-1</i> exon 1 |
| YJ12591   | 5'-rArCrGrArCrGrUrUrGrArCrCrArGrCrArArGrArC-3' | Target <i>jph-1</i> exon 9 |
