# Supplementary material
Source: publisher figshare collection journal article supplement (https://gsajournals.figshare.com/articles/dataset/_/14417696)

# Supplemental Figure 3

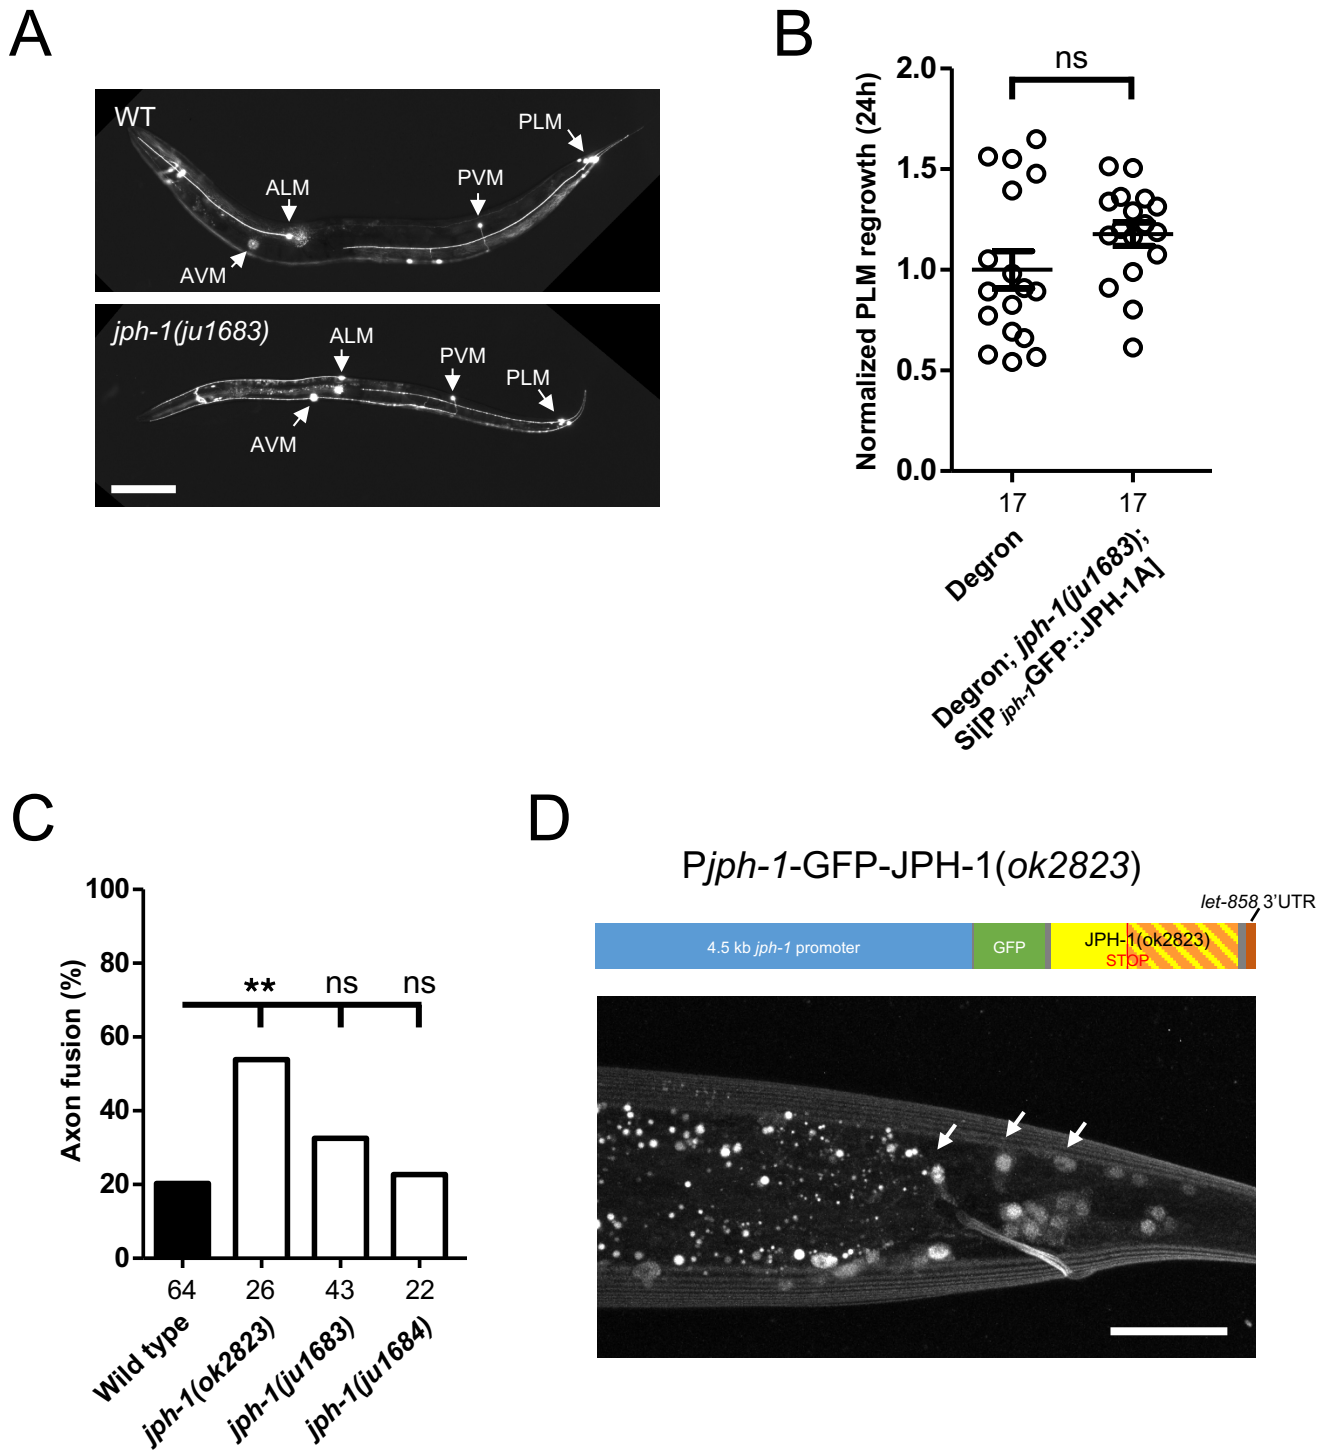

Supplement: Supplementary file 1 [file 1]

# Supplemental Figure 4

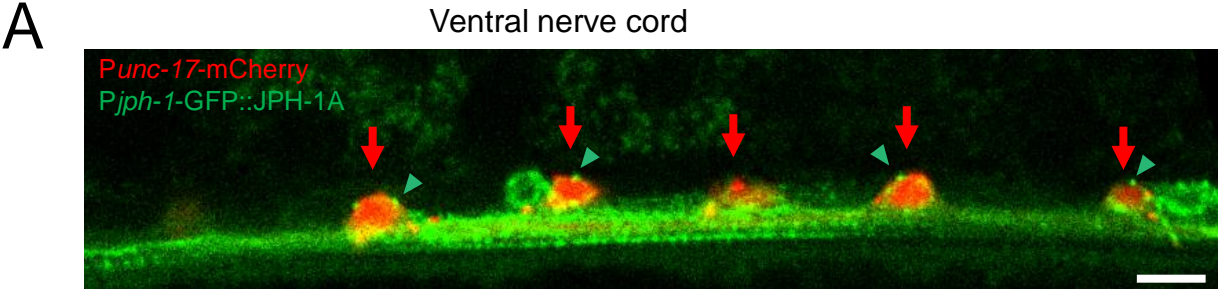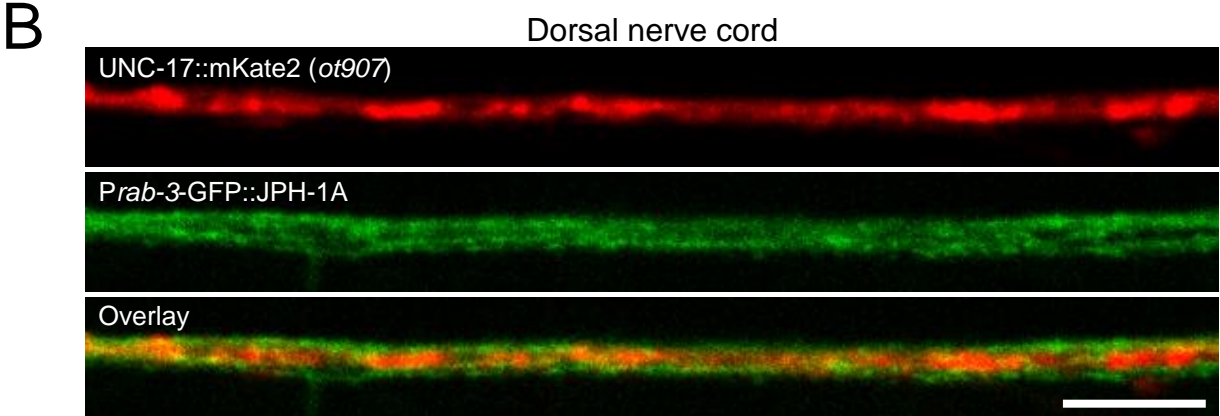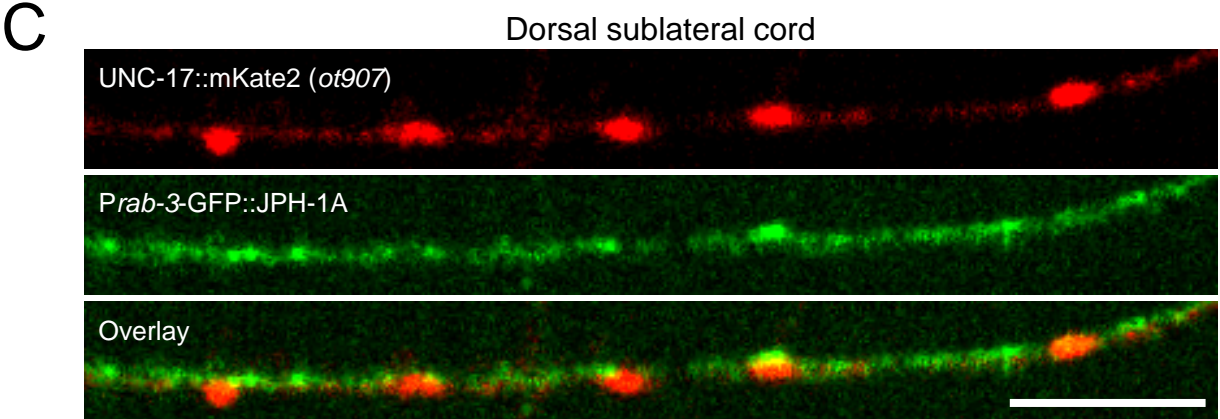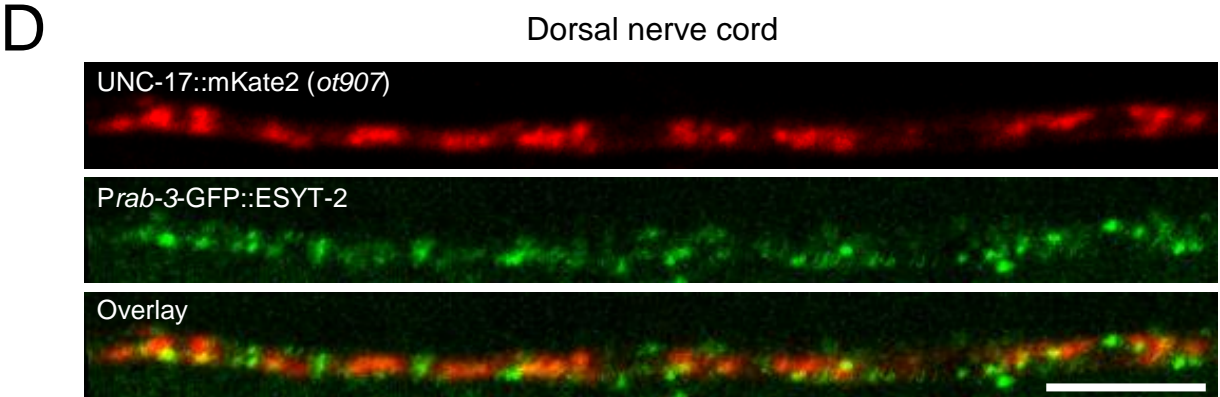

Supplement: Supplementary file 4 [file 1]

# Supplemental Figure 5

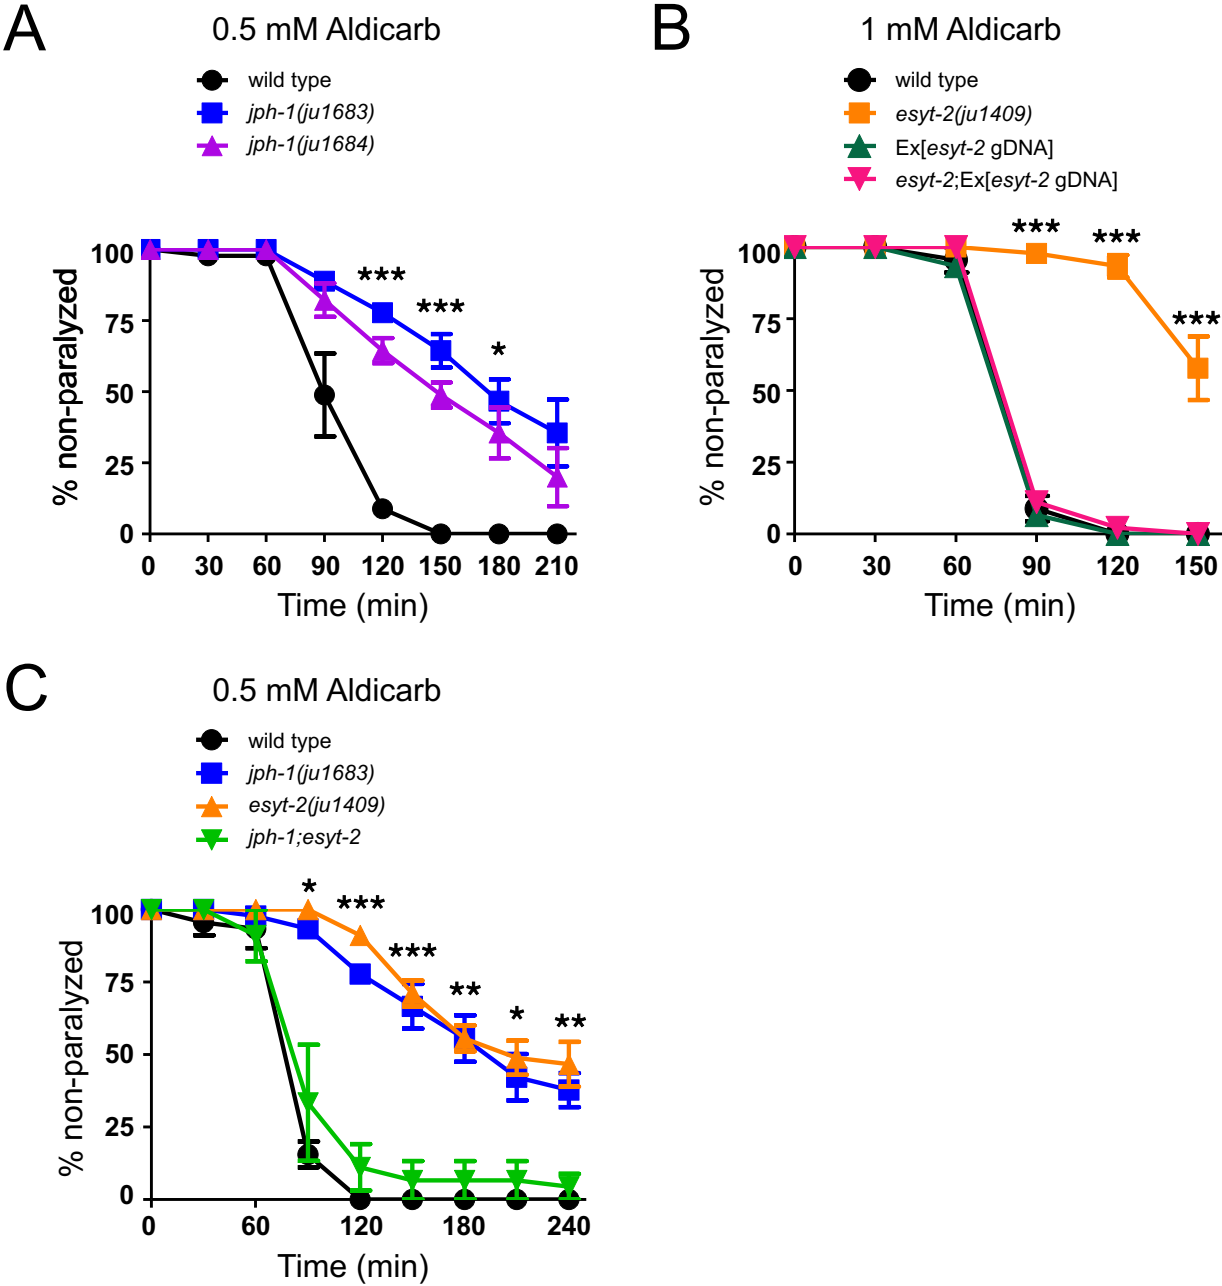

Supplement: Supplementary file 6 [file 1]

# Supplemental Figure 2

A

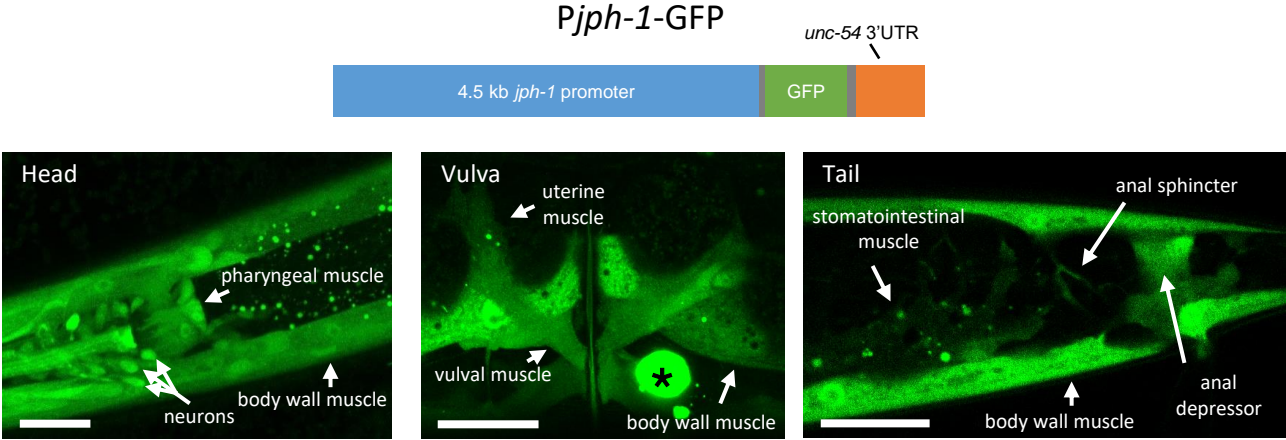

B

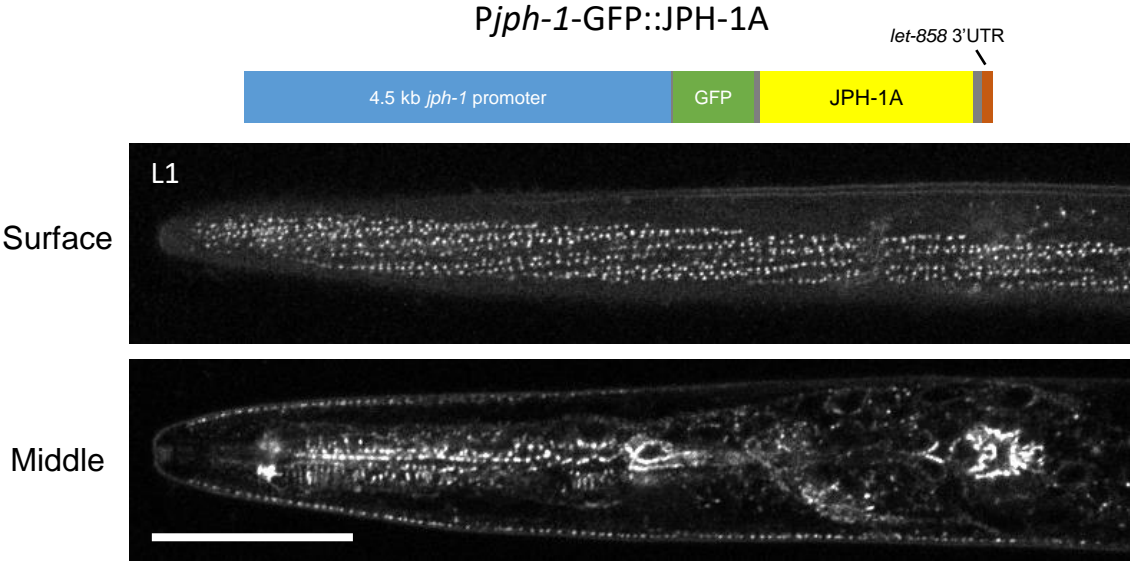

C

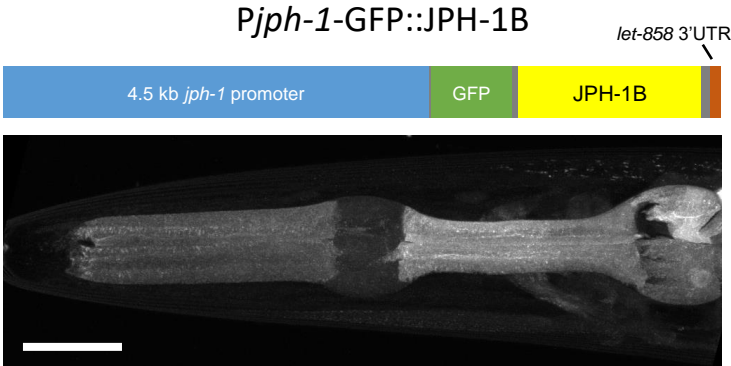

Supplement: Supplementary file 7 [file 1]

# Supplemental Figure 6

A

WT

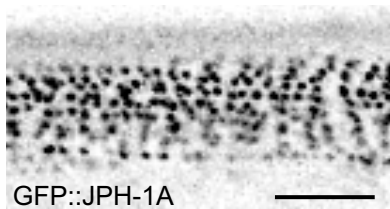

*esyt-2*

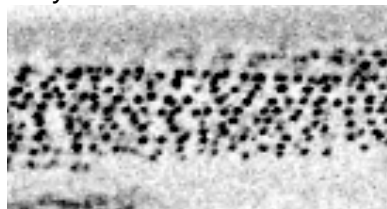

B

WT

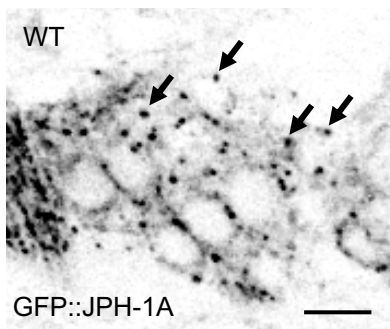

*esyt-2*

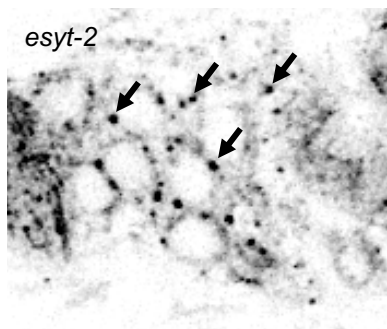

Supplement: Supplementary file 8 [file 1]
